# Supplementary material for: Efficacy of Antimicrobial Treatment in Dogs with Atopic Dermatitis: An Observational Study
Source: MDPI journal article supplement (doi:10.3390/vetsci9080385), 2022-07-27
Supplement: s1 [file s1]

**Table S1:** sex, breed, and age (in years) of the 20 dogs with atopic dermatitis that were included in the prospective study (group A) and of the 19 dogs with atopic dermatitis that were included in the retrospective study (group B).

| Dog #                                | Sex | Breed                         | Age |
|--------------------------------------|-----|-------------------------------|-----|
| <i>Prospective study (group A)</i>   |     |                               |     |
| 1                                    | M   | Bull terrier                  | 10  |
| 2                                    | MC  | Mixed-breed                   | 4   |
| 3                                    | M   | Poodle                        | 5   |
| 4                                    | M   | Labrador retriever            | 4   |
| 5                                    | F   | Dogo Argentino                | 6   |
| 6                                    | FS  | Cavalier King Charles Spaniel | 4   |
| 7                                    | FS  | Golden retriever              | 6   |
| 8                                    | F   | Mixed-breed                   | 5   |
| 9                                    | F   | Labrador retriever            | 7.5 |
| 10                                   | FS  | Mixed-breed                   | 6   |
| 11                                   | FS  | West Highland white terrier   | 5   |
| 12                                   | FS  | Pitbull terrier               | 4   |
| 13                                   | MC  | German shepherd               | 10  |
| 14                                   | FS  | Mixed-breed                   | 3.5 |
| 15                                   | MC  | Mixed-breed                   | 3.5 |
| 16                                   | MC  | French Bulldog                | 8   |
| 17                                   | FS  | Maltese terrier               | 6   |
| 18                                   | M   | Mixed-breed                   | 4.5 |
| 19                                   | MC  | Labrador retriever            | 3   |
| 20                                   | FS  | Mixed-breed                   | 2.5 |
| <i>Retrospective study (group B)</i> |     |                               |     |
| 1                                    | M   | French Bulldog                | 2   |
| 2                                    | FS  | Poodle                        | 8   |
| 3                                    | FS  | West Highland white terrier   | 3.5 |
| 4                                    | M   | German shepherd               | 9   |
| 5                                    | M   | Mixed-breed                   | 1.1 |
| 6                                    | F   | Pekingese                     | 4.5 |
| 7                                    | M   | Yorkshire terrier             | 1   |
| 8                                    | FS  | Staffordshire terrier         | 1   |
| 9                                    | F   | German shepherd               | 4   |
| 10                                   | FS  | Maltese terrier               | 7   |
| 11                                   | M   | Labrador retriever            | 3   |
| 12                                   | FS  | Yorkshire terrier             | 3   |
| 13                                   | M   | French Bulldog                | 3   |
| 14                                   | MC  | Mixed-breed                   | 1.1 |
| 15                                   | FS  | Shih-tzu                      | 13  |
| 16                                   | FS  | Shih-tzu                      | 6   |
| 17                                   | FS  | Yorkshire terrier             | 3.5 |
| 18                                   | MC  | Greek hound                   | 2.5 |
| 19                                   | FS  | Mixed-breed                   | 6.5 |

\* Abbreviations: F: female; FS: female-spayed; M: male; MC: male castrated.
