# Supplementary material for: Efficacy of Antimicrobial Treatment in Dogs with Atopic Dermatitis: An Observational Study
Source: MDPI journal article supplement (doi:10.3390/vetsci9080385), 2022-07-27
Supplement: s1 [file s1]

**Table S7:** Investigator's Global Assessment of Efficacy (IGA-E) \* and Owner's Global Assessment of Treatment Efficacy (OGATE) \*\* after treatment of infections in the 20 dogs with atopic dermatitis that were included in the prospective study (group A).

| Dog # | IGA-E | OGATE |
|-------|-------|-------|
| 1     | 1     | 1     |
| 2     | 4     | 3     |
| 3     | 3     | 3     |
| 4     | 3     | 3     |
| 5     | 2     | 0     |
| 6     | 4     | 4     |
| 7     | 3     | 3     |
| 8     | 3     | 4     |
| 9     | 1     | 0     |
| 10    | 3     | 2     |
| 11    | 0     | 1     |
| 12    | 2     | 2     |
| 13    | 3     | 3     |
| 14    | 1     | 1     |
| 15    | 3     | 3     |
| 16    | 3     | 3     |
| 17    | 1     | 3     |
| 18    | 2     | 3     |
| 19    | 2     | 1     |
| 20    | 3     | 4     |

\* IGA-E: 0-no response, 1-poor response, 2-fair response, 3-good response, 4-excellent response

\*\* OGATE: 0-no response, 1-poor response, 2-fair response, 3-good response, or 4-excellent response
