# Supplementary material for: Efficacy of Antimicrobial Treatment in Dogs with Atopic Dermatitis: An Observational Study
Source: MDPI journal article supplement (doi:10.3390/vetsci9080385), 2022-07-27
Supplement: s1 [file s1]

**Table S2:** type of infection (bacterial overgrowth, superficial pyoderma, deep pyoderma and/or *Malassezia* dermatitis), selection of systemic antibacterials (empirical or based on culture and susceptibility test) and number of days between initial examination and re-examination [days (time 0-time1)] for the 20 dogs with atopic dermatitis that were included in the prospective study (group A) and the 19 dogs with atopic dermatitis that were included in the retrospective study (group B).

| Dog #                                | Type of infection | Selection of antibacterial | Days (time 0-time 1) |
|--------------------------------------|-------------------|----------------------------|----------------------|
| <i>Prospective study (group A)</i>   |                   |                            |                      |
| 1                                    | SP + MD           | C-S                        | 47                   |
| 2                                    | MD                |                            | 26                   |
| 3                                    | MD                |                            | 34                   |
| 4                                    | SP + MD           | E                          | 32                   |
| 5                                    | MD                |                            | 39                   |
| 6                                    | SP + MD           | C-S                        | 35                   |
| 7                                    | BO + MD           | E                          | 34                   |
| 8                                    | MD                |                            | 30                   |
| 9                                    | MD                |                            | 30                   |
| 10                                   | SP + MD           | E                          | 28                   |
| 11                                   | BO + MD           | E                          | 39                   |
| 12                                   | SP + MD           | E                          | 27                   |
| 13                                   | DP + MD           | C-S                        | 28                   |
| 14                                   | SP + MD           | C-S                        | 28                   |
| 15                                   | BO + MD           | E                          | 28                   |
| 16                                   | BO + MD           | E                          | 38                   |
| 17                                   | BO + MD           | E                          | 28                   |
| 18                                   | MD                |                            | 28                   |
| 19                                   | BO + MD           | E                          | 29                   |
| 20                                   | BO + MD           | E                          | 36                   |
| <i>Retrospective study (group B)</i> |                   |                            |                      |
| 1                                    | BO + MD           | E                          | 28                   |
| 2                                    | MD                |                            | 28                   |
| 3                                    | MD                |                            | 35                   |
| 4                                    | BO + MD           | C-S                        | 35                   |
| 5                                    | MD                |                            | 42                   |
| 6                                    | DP                | C-S                        | 26                   |
| 7                                    | BO + MD           | E                          | 27                   |
| 8                                    | SP + MD           | E                          | 28                   |
| 9                                    | BO                | E                          | 27                   |
| 10                                   | BO + MD           | E                          | 35                   |
| 11                                   | SP                | E                          | 28                   |
| 12                                   | SP + MD           | E                          | 35                   |
| 13                                   | MD                |                            | 27                   |
| 14                                   | SP                | E                          | 28                   |
| 15                                   | BO + MD           | E                          | 42                   |
| 16                                   | BO + MD           | E                          | 27                   |
| 17                                   | MD                |                            | 35                   |
| 18                                   | SP + MD           | E                          | 36                   |
| 19                                   | SP + MD           | E                          | 21                   |

\* Abbreviations: BO: bacterial overgrowth; DP: deep pyoderma; MD: *Malassezia* dermatitis; SP: superficial pyoderma.
