# Supplementary material for: Efficacy of Antimicrobial Treatment in Dogs with Atopic Dermatitis: An Observational Study
Source: MDPI journal article supplement (doi:10.3390/vetsci9080385), 2022-07-27
Supplement: s1 [file s1]

**Table S5:** Owner's Global Assessment of Severity (OGA-S) of skin lesions scores \* before (time 0) and after (time 1) treatment of infections and numerical change of OGA-S between time 0 and time 1 in the 20 dogs with atopic dermatitis that were included in the prospective study (group A).

| Dog # | OGA-S (time 0) | OGA-S (time 1) | Change of OGA-S |
|-------|----------------|----------------|-----------------|
| 1     | 2              | 2              | 0               |
| 2     | 2              | 2              | 0               |
| 3     | 4              | 1              | -3              |
| 4     | 3              | 2              | -1              |
| 5     | 3              | 2              | -1              |
| 6     | 4              | 1              | -3              |
| 7     | 3              | 2              | -1              |
| 8     | 3              | 2              | -1              |
| 9     | 2              | 1              | -1              |
| 10    | 4              | 3              | -1              |
| 11    | 3              | 2              | -1              |
| 12    | 2              | 2              | 0               |
| 13    | 3              | 2              | -1              |
| 14    | 2              | 3              | 1               |
| 15    | 3              | 1              | -2              |
| 16    | 3              | 2              | -1              |
| 17    | 3              | 1              | -2              |
| 18    | 2              | 3              | 1               |
| 19    | 4              | 4              | 0               |
| 20    | 2              | 1              | -1              |

\* OGA-S scale: 1-absence of lesions, 2-mild lesions, 3-moderate lesions, 4-extensive lesions
