# Supplementary material for: Efficacy of Antimicrobial Treatment in Dogs with Atopic Dermatitis: An Observational Study
Source: MDPI journal article supplement (doi:10.3390/vetsci9080385), 2022-07-27
Supplement: s1 [file s1]

**Table S6:** Pruritus Visual Analogue Scale (PVAS) scores before (time 0) and after (time 1) treatment of infections and percent change of PVAS between time 0 and time 1 (% change PVAS) in the 20 dogs with atopic dermatitis that were included in the prospective study (group A) and the 19 dogs with atopic dermatitis that were included in the retrospective study (group B).

| Dog #                                | PVAS (time 0) | PVAS (time 1) | % change PVAS    |
|--------------------------------------|---------------|---------------|------------------|
| <i>Prospective study (group A)</i>   |               |               |                  |
| 1                                    | 5.5           | 4.4           | -20              |
| 2                                    | 3.2           | 1.7           | -46.9            |
| 3                                    | 2.6           | 0.4           | -84.6            |
| 4                                    | 5.6           | 2.2           | -60.7            |
| 5                                    | 3.6           | 2.2           | -38.9            |
| 6                                    | 6             | 1.7           | -71.7            |
| 7                                    | 6.8           | 4.4           | -35.3            |
| 8                                    | 5.9           | 4             | -32.2            |
| 9                                    | 3.6           | 3.1           | -13.9            |
| 10                                   | 5.9           | 1.6           | -72.9            |
| 11                                   | 3.1           | 5.4           | 74.2             |
| 12                                   | 0             | 0             | 0                |
| 13                                   | 3.6           | 1.8           | -50              |
| 14                                   | 5.8           | 5.4           | -6.9             |
| 15                                   | 6.9           | 2.7           | -60.9            |
| 16                                   | 6.6           | 2.5           | -62.1            |
| 17                                   | 6.8           | 3.8           | -44.1            |
| 18                                   | 6.4           | 3.4           | -46.9            |
| 19                                   | 7.5           | 3.4           | -54.7            |
| 20                                   | 3.6           | 2             | -44.4            |
| Median (range) or mean $\pm$ SD      | 5.7 (0-7.5)   | 2.8 $\pm$ 1.5 | -38.6 $\pm$ 34.6 |
| <i>Retrospective study (group B)</i> |               |               |                  |
| 1                                    | 3.4           | 1             | -70.6            |
| 2                                    | 8             | 5.8           | -27.5            |
| 3                                    | 5.6           | 5.9           | 5.4              |
| 4                                    | 7.2           | 4.2           | -41.7            |
| 5                                    | 4.7           | 1.8           | -61.7            |
| 6                                    | 6.6           | 4.1           | -37.9            |
| 7                                    | 8.8           | 8.4           | -4.5             |
| 8                                    | 7.1           | 6.2           | -12.7            |
| 9                                    | 3.6           | 2.5           | -30.6            |
| 10                                   | 8             | 3.7           | -53.8            |
| 11                                   | 7.2           | 2.3           | -68.1            |
| 12                                   | 9.4           | 9.5           | 1.1              |
| 13                                   | 6             | 5.9           | -1.7             |
| 14                                   | 3.8           | 2.4           | -36.8            |
| 15                                   | 5.9           | 1.6           | -72.9            |
| 16                                   | 3.5           | 1.3           | -62.9            |
| 17                                   | 7             | 6.2           | -11.4            |
| 18                                   | 5.7           | 6.2           | 8.8              |
| 19                                   | 3.7           | 3.6           | -2.7             |
| Median (range) or mean $\pm$ SD      | 6.1 $\pm$ 1.9 | 4.4 $\pm$ 2.4 | -30.6 $\pm$ 28.3 |
| <i>Both groups</i>                   |               |               |                  |
| Median (range) or mean $\pm$ SD      | 5.5 $\pm$ 2   | 3.6 $\pm$ 2.1 | -34.7 $\pm$ 31.5 |

\* Abbreviations: SD: standard deviation
